# Supplementary material for: MAGOH is correlated with poor prognosis and is essential for cell proliferation in lower-grade glioma
Source: Aging (Albany NY). 2023 Jun 30;15(12):5713–33. doi: 10.18632/aging.204823 (PMC10333088; doi:10.18632/aging.204823)
Supplement: Supplementary Figures [file aging-15-204823-s001.pdf]

## SUPPLEMENTARY FIGURES

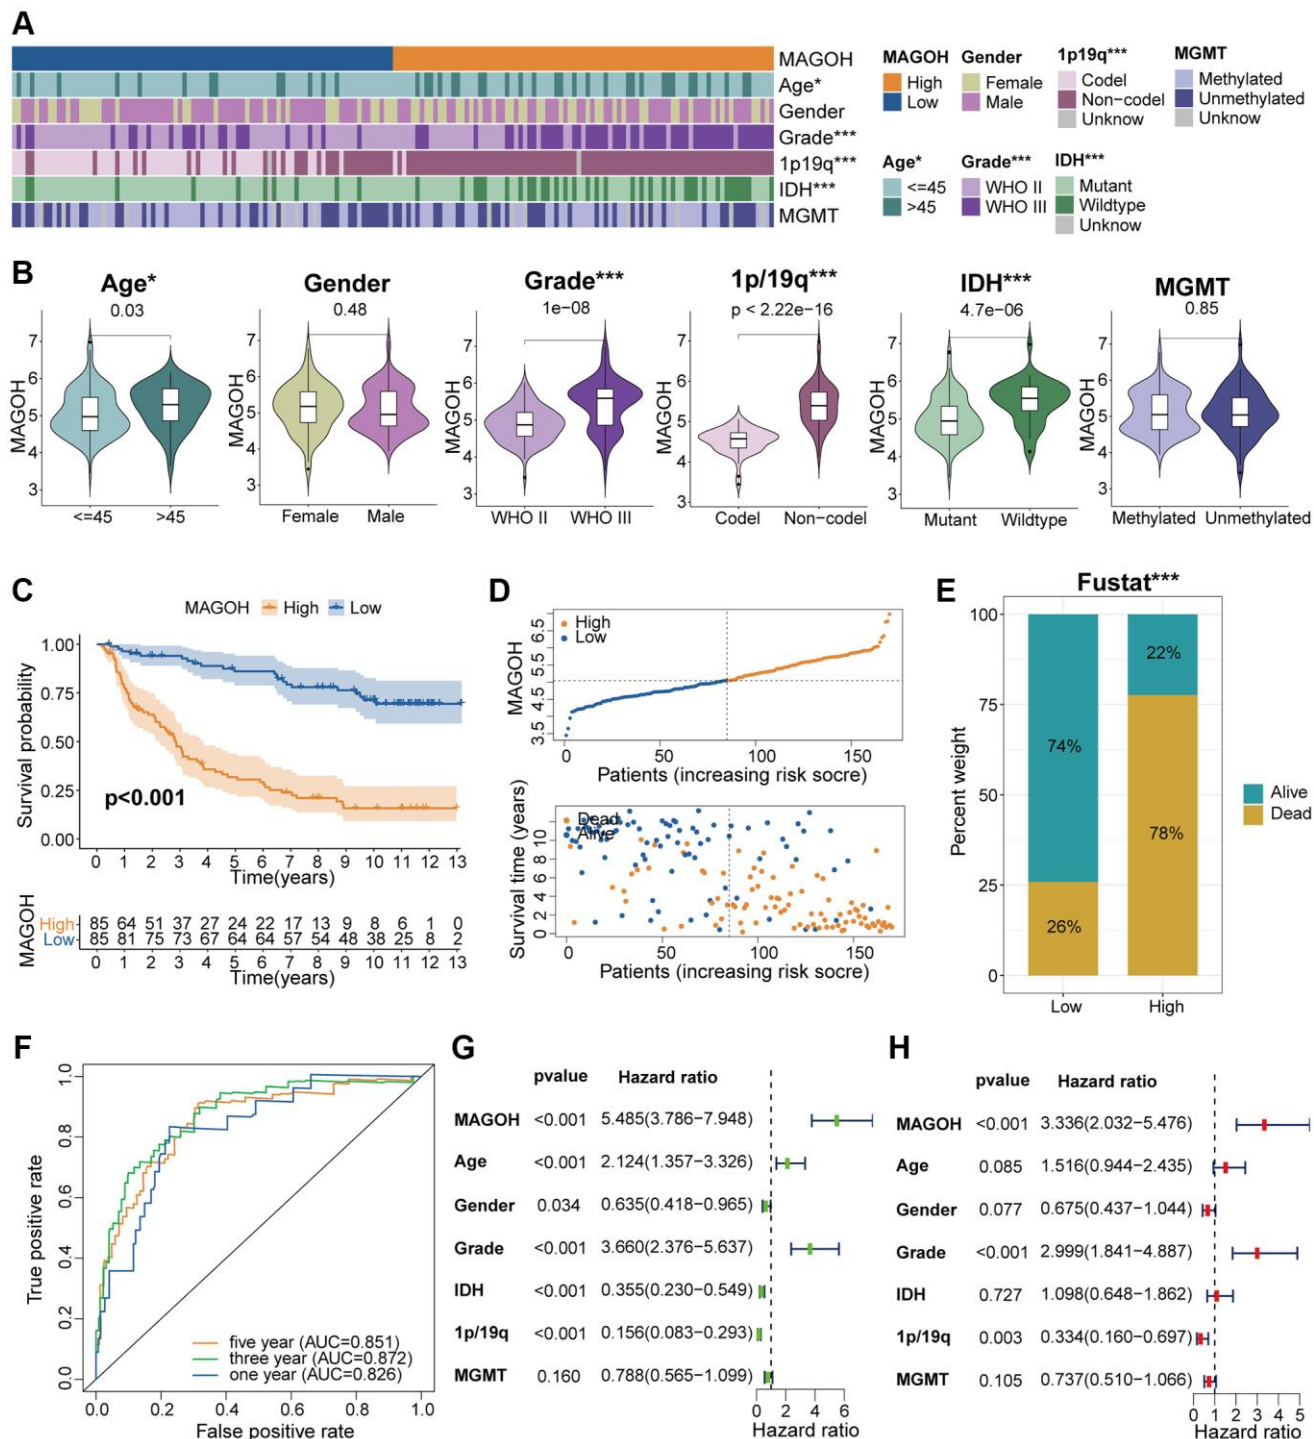

**Supplementary Figure 1. Clinical correlation analysis of MAGOH in CGGA.** (A) Connection between MAGOH expression and clinical features of LGG in CGGA. (B) Variance analysis of MAGOH expression in distinct clinical traits (including age, gender, grade, and 1p/19q, IDH, and MGMT statuses) in CGGA. (C) Prognostic analysis of high-MAGOH and low-MAGOH subgroups in CGGA. (D) Distribution of risk score, OS, and OS status of high-MAGOH and low-MAGOH subtypes in CGGA. (E) Distinct proportions of the living situation between the two subgroups. (F) ROC curves reflecting the predictive role of the risk score in CGGA. (G, H) Univariate and multivariate Cox analyses of MAGOH expression and clinical characteristics in CGGA. \* $P < 0.05$ , \*\* $P < 0.01$ , \*\*\* $P < 0.001$ .

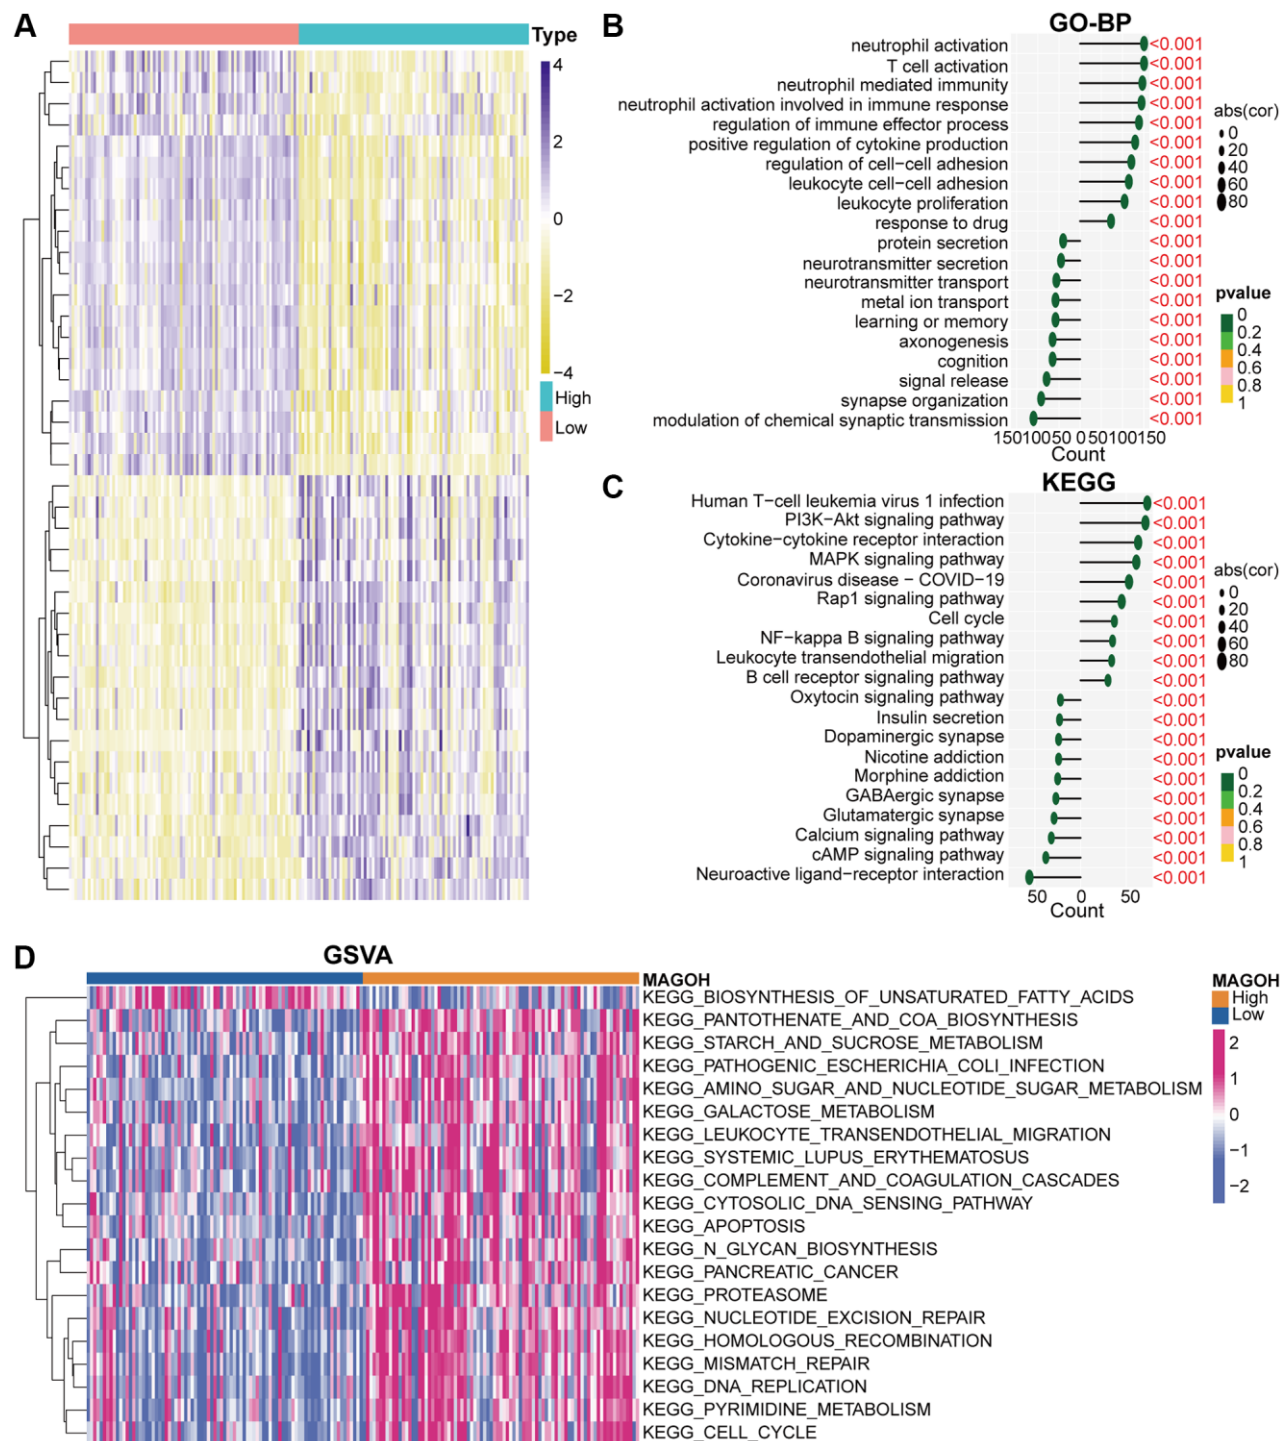

**Supplementary Figure 2. Biological functions of MAGOH in LGG in CGGA.** (A) DEGs between the low-MAGOH and high-MAGOH expression LGG subtypes. (B, C) The GO-BP (B) and KEGG (C) analyses for MAGOH in LGG patients in CGGA. (D) GSVA analysis in CGGA.

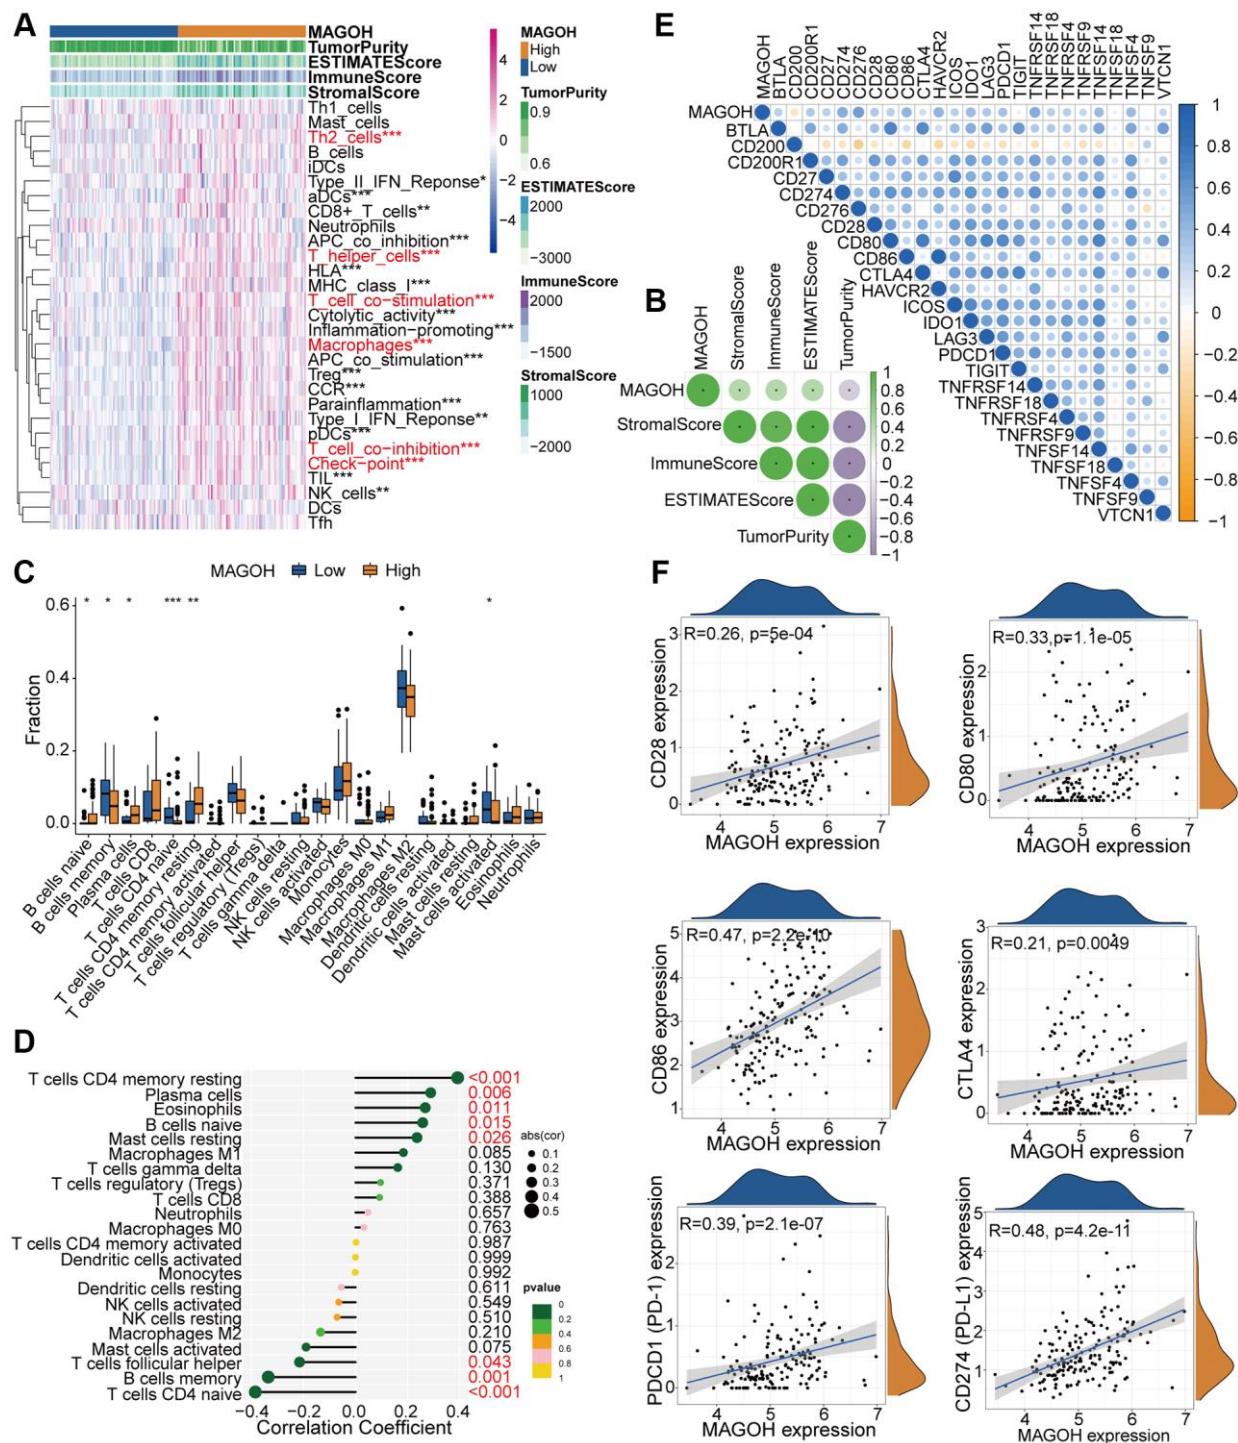

**Supplementary Figure 3. Distinct TME and immunological features of the low-MAGOH and high-MAGOH subgroups in CGGA.** (A, B) Connection between MAGOH expression and 29 immune-interrelated signatures, ESTIMATE, immune, stromal scores, and tumor purity. (C) Comparisons of infiltration of 22 types of immune cells in the two subtypes. (D) Lollipop plots displayed the association between MAGOH expression and TIICs. (E, F) Co-expression analysis of MAGOH and 25 ICPGs. \* $P < 0.05$ , \*\* $P < 0.01$ , \*\*\* $P < 0.001$ .
