# Supplementary material for: MAGOH is correlated with poor prognosis and is essential for cell proliferation in lower-grade glioma
Source: Aging (Albany NY). 2023 Jun 30;15(12):5713–33. doi: 10.18632/aging.204823 (PMC10333088; doi:10.18632/aging.204823)
Supplement: Supplementary Tables 5 and 6 [file aging-15-204823-s006.pdf]

## SUPPLEMENTARY TABLES

**Supplementary Table 5. Clinical features of LGG patients from TCGA.**

| Clinical features |              | Total (477) | %       |
|-------------------|--------------|-------------|---------|
| Age               | Age ≤45      | 287         | 60.17%  |
|                   | Age >45      | 190         | 39.83 % |
| Gender            | Female       | 216         | 45.28%  |
|                   | Male         | 261         | 54.72%  |
| Grade             | WHO II       | 231         | 48.43%  |
|                   | WHO III      | 246         | 51.57%  |
| 1p/19q            | Non-codel    | 321         | 67.30%  |
|                   | Codel        | 156         | 32.70%  |
|                   | Mutant       | 389         | 81.55%  |
| IDH               | Wildtype     | 85          | 17.82%  |
|                   | Unknow       | 3           | 0.63%   |
| MGMT              | Unmethylated | 82          | 17.19%  |
|                   | Methylated   | 395         | 82.81%  |

**Supplementary Table 6. Clinical features of LGG patients from CGGA.**

| Clinical features |              | Total (170) | %      |
|-------------------|--------------|-------------|--------|
| Age               | Age ≤45      | 129         | 75.88% |
|                   | Age >45      | 41          | 24.12% |
| Gender            | Female       | 65          | 38.24% |
|                   | Male         | 105         | 61.76% |
| Grade             | WHO II       | 97          | 57.06% |
|                   | WHO III      | 73          | 42.94% |
| 1p/19q            | Non-codel    | 113         | 66.47% |
|                   | Codel        | 55          | 32.35% |
|                   | Unknow       | 2           | 1.18%  |
| IDH               | Mutant       | 125         | 73.53% |
|                   | Wildtype     | 44          | 25.88% |
|                   | Unknow       | 1           | 0.59%  |
| MGMT              | Unmethylated | 70          | 41.18% |
|                   | Methylated   | 84          | 49.41% |
|                   | Unknow       | 16          | 9.41%  |
